# Supplementary material for: Association between neonatal hyperbilirubinemia and hypoglycemia in Chinese women with diabetes in pregnancy and influence factors
Source: Research Square preprint supplement (doi:10.21203/rs.3.rs-1240346/v1), 2022-02-07
Supplement: Supplementary file 1 [file f2252b6008d5555b3739b480.docx]

Table S1. Risk factors and outcomes for neonatal hypoglycemia and hyperbilirubinemia (n=8504)

|  | Neonatal hypoglycemia  (n=550) or  (mean ± SD) | Non-Neonatal hypoglycemia  (n=7954) or  (meanSD) | P-value | Neonatal hyperbilirubinemia  (n=546) or  (mean ± SD) | Non-Neonatal hyperbilirubinemia  (n=7958) or  (mean ± SD) | P-value |
| --- | --- | --- | --- | --- | --- | --- |
| Maternal factors | | | | | | |
| Height, cm | 158.61 | 158.53 | .714 | 158.61 | 158.56 | .076 |
| Age > 35 years | 137 (24.91) | 1768 (23.55) | .470† | 125 (22.89) | 1768 (22.37) | .775† |
| Diabetes family history | 60 (10.91) | 870 (11.59) | .983† | 56 (10.26) | 874 (10.98) | .599† |
| Thalassemia in pregnancy | 16 (2.91) | 291 (3.66) | .362† | 24 (4.40) | 283 (3.56) | .309† |
| Hysteromyoma | 29 (5.27) | 376 (4.73) | .561† | 30 (5.49) | 375 (4.71) | .406† |
| Anemia in pregnancy | 101 (18.36) | 1648 (20.72) | .186† | 103 (18.86) | 1646 (20.68) | .309† |
| Hypothyroidism in pregnancy | 57 (10.36) | 706 (8.88) | .238† | 56 (10.26) | 707 (8.88) | .278† |
| Viral hepatitis type B | 34 (6.18) | 472 (5.93) | .812† | 32 (5.86) | 474 (5.96) | .927† |
| Thrombocytopenia in pregnancy | 20 (3.64) | 216 (2.72) | .204† | 13 (2.38) | 223 (2.80) | .562† |
| GBS infection | 17 (3.09) | 313 (3.94) | .321† | 21 (3.85) | 309 (3.88) | .966† |
| Obstetric factors | | | | | | |
| Oligohydramnios | 71 (12.91) | 839 (10.55) | .083† | 78 (14.29) | 832 (10.45) | .005† |
| Polyhydramnios | 6 (1.09) | 65 (0.82) | .495† | 6 (1.10) | 65 (0.82) | .483† |
| Chorioamnionitis | 12 (2.18) | 87 (1.09) | .021† | 28 (5.13) | 71 (0.89) | ＜.001† |
| Umbilical cord around neck | 138 (25.09) | 2202 (27.68) | .188† | 130 (23.81) | 2210 (27.77) | .045† |

Values are (mean SD) or n (%), † Chi-squared.
